# Supplementary material for: Spin reorientation transition in CoFeB/MgO/CoFeB tunnel junction enabled by ultrafast laser-induced suppression of perpendicular magnetic anisotropy
Source: Royal Society of Chemistry journal article supplement (doi:10.1039/d2nr00637e), 2022-01-01
Supplement: d2nr00637e1.pdf [file d2nr00637e1.pdf]

# Spin reorientation transition in CoFeB/MgO/CoFeB tunnel junction enabled by ultrafast laser-induced suppression of perpendicular magnetic anisotropy

Leonid A. Shelukhin,<sup>1</sup> Rashid R. Gareev,<sup>2</sup> Vladyslav Zbarsky,<sup>3</sup> Jakob Walowski,<sup>3</sup> Markus Münzenberg,<sup>3</sup> Nikolay A. Pertsev,<sup>1</sup> Alexandra M. Kalashnikova<sup>1\*</sup>

<sup>1</sup>*Ioffe Institute, 194021 St. Petersburg, Russia*

<sup>2</sup>*Institute of Experimental and Applied Physics, University of Regensburg, 93040 Regensburg, Germany*

<sup>3</sup>*University of Greifswald, Institute of Physics, Felix Hausdorff Str. 6, D-17489 Greifswald, Germany*

\**e-mail: kalashnikova@mail.ioffe.ru*

## Electronic supplementary information

### Experimental

The multilayer MTJ structure Ta(5.0)/CoFeB(1.2)/MgO(1.2)/CoFeB(1.4)/Ta(5.0)/Ru(3.0) was grown on the thermally oxidized silicon substrate by magnetron sputtering in an ultra-high vacuum chamber using Co-Fe-B targets with nominal composition Co:Fe:B = 0.2:0.6:0.2 as described elsewhere [1]. Here numbers in parentheses stand for the layers thicknesses in nm (see Fig. 1a in the main text). The resulting composition of the ferromagnetic layers in the stack is Co:Fe:B = 0.26:0.54:0.20.

For low-temperature measurements, the sample was placed in a helium-flow cryostat. Static external magnetic field generated by an electromagnet was applied either in the sample plane (IP geometry) or perpendicularly to this plane (PP geometry). The magnetic field strength was varied up to 0.8 T at  $T = 295$  K and up to 0.5 T at  $T = 140$  K.

The pump pulses with a wavelength of 515 nm used in our experiments were generated with  $\beta$ -barium borate single crystal to double the photon energy of a regenerative amplifier output (Light Conversion, PHAROS). Regenerative amplifier delivers pulses with a duration of 170 fs and a wavelength of 1030 nm at 5 kHz repetition rate. The pump pulses were focused onto the sample surface to a spot with a diameter of about 200  $\mu\text{m}$  using plano-convex spherical lens. The

pump-induced dynamics were measured in a reflection geometry. The linearly polarized probe pulses with wavelength of 1030 nm were focused onto the sample plane to a spot with a diameter about 100  $\mu\text{m}$  with the incidence angle of  $12^\circ$ . The magneto-optical Kerr effect was traced by the polarization ellipticity  $\Delta\varepsilon(\Delta t)$  of the reflected probe pulse, which was measured with the quarter-wave plate, Wollaston prism, and a balanced photodetector. Lock-in detection scheme was used to demodulate the pump-induced changes  $\Delta\varepsilon(\Delta t)$  of the Kerr ellipticity. For this purpose, the probe beam was modulated at 625 Hz by the mechanical chopper.

In all experiments the transient changes of the ellipticity  $\varepsilon(\Delta t)$  of the probe pulses were measured in the positive ( $+H_{\text{ext}}$ ) and negative ( $-H_{\text{ext}}$ ) applied fields, and the magneto-optical Kerr ellipticity was calculated as  $\Delta\varepsilon(\Delta t, H_{\text{ext}}) = 0.5[\varepsilon(\Delta t, +H_{\text{ext}}) - \varepsilon(\Delta t, -H_{\text{ext}})] \propto \Delta M_z(\Delta t, H_{\text{ext}})$  in order to eliminate possible nonmagnetic contributions to the measured signal. As the total thickness of the CoFeB/MgO/CoFeB MTJ structure including the 8-nm-thick Ta/Ru capping layer amounts to 11.8 nm, transient changes of the magnetizations of both ferromagnetic layers contribute to  $\Delta\varepsilon(\Delta t, H_{\text{ext}})$ . This is confirmed by the static hysteresis curve measured in the PP geometry, which reveals clearly distinguishable states with parallel and antiparallel magnetizations of the CoFeB layers (Fig. 1b in the main text).

### Fitting pump-probe traces

Frequency  $f$  of the laser-induced precession was obtained by fitting the experimental curves to the function  $\varepsilon_0(\Delta t) = A \cdot \cos(2\pi f \Delta t + \xi_0) \cdot e^{-t/\tau_1} + B e^{-t/\tau_2}$ , where  $A$  is the amplitude,  $\xi_0$  is the initial phase, and  $\tau_1$  the damping time of the magnetization precession. The term  $B e^{-t/\tau_2}$  describes the laser-induced demagnetization along with the variation of the direction of effective field  $\mathbf{H}_{\text{eff}}$ , where  $B$  is the initial step-like change, and  $\tau_2$  is the relaxation time.

### Extracting the values of anisotropy parameters

The parameters  $K_{\text{eff}}(J)$  and  $K_{\text{IA}}(J)$  characterizing the effective and interfacial anisotropies of the optically excited fixed CoFeB layer were calculated as a function of the reduced saturation magnetization  $M_s'(J)$  with the aid of the Smit-Suhl formula [2,3], which links the precession frequency  $f(J)$  to the derivatives of the effective volumetric energy density  $F_m = (K_{\text{IA}}/d + \mu_0 M_S^2/2)m_z^2 - \mu_0 M_S \mathbf{m} \cdot \mathbf{H}_{\text{ext}}$ . Variations of  $M_s'$  with the pump fluence  $J$  were determined using the data on the laser-induced demagnetization measured in PP geometry (see Fig. 3e) and taking the magnetization  $M_S$  of the non-excited fixed layer to be  $0.9 \times 10^6$  A/m at  $T = 295$  K and  $1 \times 10^6$  A/m at  $T = 140$  K [1]. The values of  $K_{\text{eff}}(J)$  and  $K_{\text{IA}}(J)$  were found by numerically solving the equation  $f[K_{\text{eff}}(J), M_s'(J), H_{\text{ext}}] = f_{\text{exp}}(J)$  at the magnetic field strength  $\mu_0 H_{\text{ext}} = 0.2$  T for  $T = 295$  K and  $\mu_0 H_{\text{ext}} = 0.35$  T for  $T = 140$  K.

## References

- [1] Gareev, R. R., et al. The role of weak interlayer coupling in the spin-reorientation of perpendicular ultrathin Co-Fe-B/MgO-based heterostructures. *Appl. Phys. Lett.* 106, 132408 (2015).
- [2] Smit, J., Beljers, H. G. Ferromagnetic resonance absorption in BaFe<sub>12</sub>O<sub>19</sub> a highly anisotropic crystal. *Philips Res. Repts* 10, 113-130 (1955).
- [3] Suhl, H. Ferromagnetic resonance in nickel ferrite between one and two kilomegacycles. *Phys. Rev.* 97, 555–557 (1955).
